# Supplementary figures and images for: Genetic Diversity and Streptomycin Sensitivity in Xanthomonas axonopodis pv. punicae Causing Oily Spot Disease in Pomegranates
Source: MDPI journal article supplement (doi:10.3390/horticulturae8050441), 2022-05-16

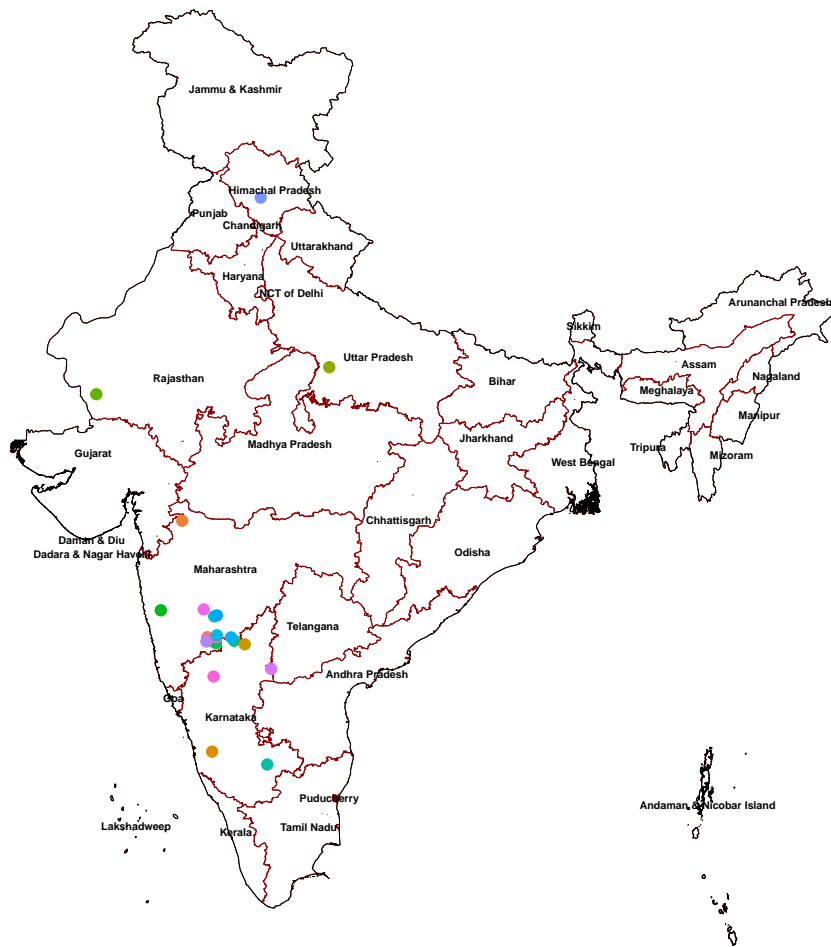

## Xap

- |           |          |
|-----------|----------|
| ● XAP-104 | ● XAP-61 |
| ● XAP-108 | ● XAP-63 |
| ● XAP-110 | ● XAP-83 |
| ● XAP-112 | ● XAP-88 |
| ● XAP-114 | ● XAP-92 |
| ● XAP-115 | ● XAP-93 |
| ● XAP-116 | ● XAP-94 |
| ● XAP-117 | ● XAP-96 |
| ● XAP-119 | ● XAP-97 |
| ● XAP-134 | ● XAP-98 |
| ● XAP-60  | ● XAP-99 |

Supplement: s1 [file s1]
